# Supplementary material for: Structures, electronic properties, reactivity and dynamic studies of three new polyoxometalate compounds
Source: Royal Society of Chemistry journal article supplement (doi:10.1039/c8dt02205d), 2018-01-01
Supplement: c8dt02205d1.pdf [file c8dt02205d1.pdf]

**Table S1.** Electrostatic and Mulliken atomic charges of compound **1** calculated at the PM3 level.

| Atom no. | Atoms | Electrostatic | Mulliken |
|----------|-------|---------------|----------|
| 1        | Mo1   | +2.178        | +0.022   |
| 2        | Mo2   | +2.318        | +0.121   |
| 3        | Mo3   | +2.240        | +0.103   |
| 4        | Mo4   | +2.186        | +0.046   |
| 5        | Mo5   | +2.242        | +0.037   |
| 6        | P1    | +2.757        | +2.218   |
| 7        | P2    | +2.807        | +2.234   |
| 8        | O1    | -0.858        | -0.300   |
| 9        | O2    | -1.206        | -0.857   |
| 10       | O3    | -1.181        | -0.746   |
| 11       | O4    | -0.608        | -0.096   |
| 12       | O5    | -1.019        | -0.658   |
| 13       | O6    | -0.580        | -0.062   |
| 14       | O7    | -1.328        | -0.867   |
| 15       | O8    | -0.766        | -0.275   |
| 16       | O9    | -1.290        | -0.909   |
| 17       | O10   | -1.020        | -0.167   |
| 18       | O11   | -0.912        | -0.116   |
| 19       | O12   | -1.222        | -0.762   |
| 20       | O13   | -1.039        | -0.244   |
| 21       | O14   | -0.756        | -0.248   |
| 22       | O15   | -0.630        | -0.089   |
| 23       | O16   | -1.224        | -0.757   |
| 24       | O17   | -0.922        | -0.332   |
| 25       | O18   | -0.661        | -0.155   |
| 26       | O19   | -0.961        | -0.134   |
| 27       | O20   | -0.993        | -0.651   |
| 28       | O22   | -0.731        | -0.198   |
| 29       | O23   | -0.945        | -0.397   |
| 30       | O24   | -0.887        | -0.104   |
| 31       | H1o5  | +0.432        | +0.212   |
| 32       | H1o20 | +0.414        | +0.189   |
| 33       | O21   | -0.860        | -0.386   |
| 34       | H1o21 | +0.501        | +0.208   |
| 35       | H2o21 | +0.369        | +0.166   |
| 36       | O25   | -0.890        | -0.397   |
| 37       | H1o25 | +0.512        | +0.227   |
| 38       | H2o25 | +0.362        | +0.178   |
| 39       | O26   | -0.840        | -0.347   |
| 40       | H1o26 | +0.375        | +0.145   |
| 41       | H2o26 | +0.505        | +0.215   |
| 42       | O27   | -0.848        | -0.395   |
| 43       | H1o27 | +0.457        | +0.224   |
| 44       | H2o27 | +0.386        | +0.180   |
| 45       | O28   | -0.921        | -0.405   |

---

|    |       |        |        |
|----|-------|--------|--------|
| 46 | H2o28 | +0.483 | +0.240 |
| 47 | H1o28 | +0.407 | +0.171 |
| 48 | N1    | +0.708 | +1.084 |
| 49 | C1    | -0.013 | -0.370 |
| 50 | C5    | -0.129 | -0.075 |
| 51 | C7    | -0.015 | +0.014 |
| 52 | C10   | -0.017 | -0.035 |
| 53 | C12   | -0.310 | -0.049 |
| 54 | C14   | +0.001 | -0.081 |
| 55 | H1c5  | +0.107 | +0.105 |
| 56 | H1c7  | +0.097 | +0.139 |
| 57 | H1c10 | +0.085 | +0.096 |
| 58 | H1c12 | +0.144 | +0.099 |
| 59 | H1c14 | +0.088 | +0.100 |
| 60 | H1n1  | +0.108 | -0.026 |
| 61 | H2n1  | +0.181 | +0.037 |
| 62 | H3n1  | +0.018 | -0.070 |
| 63 | N2    | +0.662 | +1.137 |
| 64 | C6    | +0.064 | -0.044 |
| 65 | C11   | -0.126 | +0.001 |
| 66 | C16   | -0.196 | -0.393 |
| 67 | C19   | -0.233 | -0.016 |
| 68 | C21   | +0.087 | -0.069 |
| 69 | C24   | -0.150 | -0.011 |
| 70 | H1c6  | +0.089 | +0.106 |
| 71 | H1c11 | +0.111 | +0.102 |
| 72 | H1c19 | +0.161 | +0.104 |
| 73 | H1c21 | +0.068 | +0.099 |
| 74 | H1c24 | +0.117 | +0.097 |
| 75 | H1n2  | +0.079 | -0.069 |
| 76 | H2n2  | +0.052 | -0.073 |
| 77 | H3n2  | +0.250 | +0.011 |
| 78 | N3    | +0.330 | +1.107 |
| 79 | C3    | -0.228 | -0.051 |
| 80 | C4    | -0.057 | -0.393 |
| 81 | C9    | +0.046 | -0.085 |
| 82 | C17   | -0.154 | +0.037 |
| 83 | C22   | -0.182 | -0.033 |
| 84 | C23   | +0.107 | -0.080 |
| 85 | H1c3  | +0.126 | +0.095 |
| 86 | H1c9  | +0.076 | +0.100 |
| 87 | H1c17 | +0.123 | +0.149 |
| 88 | H1c22 | +0.115 | +0.097 |
| 89 | H1c23 | +0.069 | +0.108 |
| 90 | H1n3  | +0.237 | -0.036 |
| 91 | H2n3  | +0.120 | -0.060 |
| 92 | H3n3  | +0.299 | +0.025 |
| 93 | N4    | +0.804 | +1.118 |
| 94 | C2    | -0.015 | -0.070 |

---

---

|     |       |        |        |
|-----|-------|--------|--------|
| 95  | C8    | -0.185 | -0.019 |
| 96  | C13   | -0.203 | +0.012 |
| 97  | C15   | -0.037 | -0.085 |
| 98  | C18   | -0.125 | -0.373 |
| 99  | C20   | -0.022 | -0.037 |
| 100 | H1c2  | +0.085 | +0.104 |
| 101 | H1c8  | +0.138 | +0.101 |
| 102 | H1c13 | +0.189 | +0.127 |
| 103 | H1c15 | +0.087 | +0.097 |
| 104 | H1c20 | +0.078 | +0.092 |
| 105 | H1n4  | +0.006 | -0.067 |
| 106 | H2n4  | +0.043 | -0.052 |
| 107 | H3n4  | +0.215 | +0.040 |

---

**Table S2.** Electrostatic and Mulliken atomic charges of compound **2** calculated at the PM3 level.

| Atom no. | Atoms | Electrostatic | Mulliken |
|----------|-------|---------------|----------|
| 1        | Mo1   | +1.686        | +0.022   |
| 2        | Mo2   | +1.620        | -0.074   |
| 3        | Mo3   | +1.735        | +0.006   |
| 4        | Mo4   | +1.572        | -0.061   |
| 5        | Mo5   | +1.748        | +0.000   |
| 6        | P1    | +2.842        | +2.109   |
| 7        | P2    | +2.239        | +2.068   |
| 8        | O1    | -0.705        | -0.601   |
| 9        | O2    | -0.717        | -0.148   |
| 10       | O3    | -0.852        | -0.581   |
| 11       | O4    | -1.280        | -0.590   |
| 12       | O5    | -0.574        | -0.277   |
| 13       | O6    | -1.306        | -0.623   |
| 14       | O7    | -1.127        | -0.611   |
| 15       | O8    | -1.008        | -0.597   |
| 16       | O9    | -0.793        | -0.504   |
| 17       | O10   | -1.199        | -0.694   |
| 18       | O11   | -0.988        | -0.643   |
| 19       | O12   | -0.572        | -0.274   |
| 20       | O13   | -0.745        | -0.185   |
| 21       | O14   | -0.724        | -0.304   |
| 22       | O15   | -0.659        | -0.291   |
| 23       | O16   | -0.775        | -0.225   |
| 24       | O17   | -0.554        | -0.281   |
| 25       | O18   | -0.350        | -0.001   |
| 26       | O20   | -0.784        | -0.550   |
| 27       | O21   | -0.788        | -0.221   |
| 28       | O22   | -0.812        | -0.188   |
| 29       | O23   | -0.287        | +0.049   |
| 30       | O24   | -0.601        | -0.331   |
| 31       | H1o1  | +0.295        | +0.263   |
| 32       | H1o3  | +0.359        | +0.253   |
| 33       | O19   | -0.718        | -0.422   |
| 34       | H1o19 | +0.377        | +0.235   |
| 35       | H2o19 | +0.381        | +0.189   |
| 36       | N1    | +0.836        | +0.256   |
| 37       | C7    | -0.511        | -0.160   |
| 38       | C9    | -0.688        | -0.190   |
| 39       | H1c7  | +0.146        | +0.069   |
| 40       | H2c7  | +0.141        | +0.062   |
| 41       | H3c7  | +0.202        | +0.085   |
| 42       | H1c9  | +0.182        | +0.081   |
| 43       | H2c9  | +0.197        | +0.103   |
| 44       | H3c9  | +0.183        | +0.066   |
| 45       | H1n1  | -0.012        | +0.193   |

---

|    |       |        |        |
|----|-------|--------|--------|
| 46 | H2n1  | -0.044 | +0.194 |
| 47 | N2    | +0.955 | +0.209 |
| 48 | C2    | -0.815 | -0.167 |
| 49 | C3    | -0.785 | -0.161 |
| 50 | H1c2  | +0.246 | +0.084 |
| 51 | H2c2  | +0.194 | +0.065 |
| 52 | H3c2  | +0.229 | +0.069 |
| 53 | H1c3  | +0.207 | +0.095 |
| 54 | H2c3  | +0.212 | +0.064 |
| 55 | H3c3  | +0.217 | +0.062 |
| 56 | H1n2  | -0.021 | +0.202 |
| 57 | H2n2  | +0.070 | +0.203 |
| 58 | N3    | +0.785 | +0.232 |
| 59 | C1    | -0.800 | -0.169 |
| 60 | C10   | -0.712 | -0.167 |
| 61 | H1c1  | +0.221 | +0.071 |
| 62 | H2c1  | +0.229 | +0.058 |
| 63 | H3c1  | +0.189 | +0.086 |
| 64 | H1c10 | +0.211 | +0.104 |
| 65 | H2c10 | +0.202 | +0.070 |
| 66 | H3c10 | +0.211 | +0.062 |
| 67 | H1n3  | +0.031 | +0.201 |
| 68 | H2n3  | +0.114 | +0.202 |
| 69 | N4    | +0.471 | +0.145 |
| 70 | C4    | -0.431 | -0.141 |
| 71 | C6    | -0.781 | -0.156 |
| 72 | H1c4  | +0.108 | +0.046 |
| 73 | H2c4  | +0.136 | +0.050 |
| 74 | H3c4  | +0.185 | +0.101 |
| 75 | H1c6  | +0.231 | +0.109 |
| 76 | H2c6  | +0.223 | +0.072 |
| 77 | H3c6  | +0.212 | +0.047 |
| 78 | H1n4  | +0.264 | +0.205 |
| 79 | H2n4  | +0.191 | +0.222 |
| 80 | N5    | +1.002 | +0.346 |
| 81 | C5    | -0.810 | -0.190 |
| 82 | C8    | -0.721 | -0.191 |
| 83 | H1c5  | +0.211 | +0.075 |
| 84 | H2c5  | +0.246 | +0.095 |
| 85 | H3c5  | +0.196 | +0.066 |
| 86 | H1c8  | +0.227 | +0.110 |
| 87 | H2c8  | +0.192 | +0.069 |
| 88 | H3c8  | +0.198 | +0.081 |
| 89 | H1n5  | +0.144 | +0.195 |
| 90 | H2n5  | -0.019 | +0.166 |
| 91 | O1d   | -0.276 | -0.215 |
| 92 | O1w   | -0.334 | -0.212 |
| 93 | O2w   | -0.534 | -0.404 |
| 94 | C2d   | -0.140 | -0.113 |

---

---

|     |       |        |        |
|-----|-------|--------|--------|
| 95  | C3d   | -0.398 | -0.115 |
| 96  | N1d   | -0.068 | +0.030 |
| 97  | C1d   | +0.733 | +0.517 |
| 98  | H1c2d | +0.051 | +0.085 |
| 99  | H2c2d | +0.115 | +0.063 |
| 100 | H3c2d | +0.170 | +0.082 |
| 101 | H1c3d | +0.224 | +0.113 |
| 102 | H2c3d | +0.172 | +0.073 |
| 103 | H3c3d | +0.229 | +0.097 |
| 104 | H1c1d | +0.378 | +0.286 |
| 105 | H2c1d | +0.050 | +0.037 |

---

**Table S3.** Electrostatic and Mulliken atomic charges of compound **3** calculated at the PM3 level.

| Atom no. | Atoms | Electrostatic | Mulliken |
|----------|-------|---------------|----------|
| 1        | Mo1   | +2.488        | +0.190   |
| 2        | O2    | -0.853        | -0.249   |
| 3        | O3    | -0.866        | -0.120   |
| 4        | O4    | -0.977        | -0.162   |
| 5        | O5    | -0.900        | -0.139   |
| 6        | O6    | -0.958        | -0.170   |
| 7        | O7    | -1.189        | -0.721   |
| 8        | Mo8   | +2.330        | +0.077   |
| 9        | Mo9   | +2.317        | +0.113   |
| 10       | Mo10  | +2.351        | +0.128   |
| 11       | Mo11  | +2.318        | +0.070   |
| 12       | P12   | +2.511        | +2.297   |
| 13       | O13   | -0.621        | -0.051   |
| 14       | O14   | -0.927        | -0.112   |
| 15       | O15   | -0.805        | -0.016   |
| 16       | O16   | -0.847        | -0.095   |
| 17       | O17   | -0.615        | -0.057   |
| 18       | O18   | -0.829        | -0.093   |
| 19       | O19   | -0.923        | -0.145   |
| 20       | O20   | -0.854        | -0.104   |
| 21       | O21   | -1.152        | -0.701   |
| 22       | O22   | -0.598        | -0.035   |
| 23       | O23   | -0.929        | -0.147   |
| 24       | O24   | -0.905        | -0.131   |
| 25       | O25   | -0.610        | -0.033   |
| 26       | O26   | -0.769        | -0.037   |
| 27       | O27   | -0.727        | +0.013   |
| 28       | O28   | -1.204        | -0.718   |
| 29       | O29   | -1.170        | -0.712   |
| 30       | Mo30  | +2.420        | +0.149   |
| 31       | Mo31  | +2.324        | +0.053   |
| 32       | Mo32  | +2.444        | +0.160   |
| 33       | Mo33  | +2.347        | +0.104   |
| 34       | Mo34  | +2.350        | +0.109   |
| 35       | Mo35  | +2.341        | +0.116   |
| 36       | Mo36  | +2.359        | +0.128   |
| 37       | O37   | -0.834        | -0.247   |
| 38       | O38   | -0.825        | -0.091   |
| 39       | O39   | -0.897        | -0.132   |
| 40       | O40   | -0.961        | -0.160   |
| 41       | O41   | -0.607        | -0.028   |
| 42       | O42   | -0.850        | -0.120   |
| 43       | O43   | -0.842        | -0.249   |
| 44       | O44   | -0.977        | -0.156   |
| 45       | O45   | -0.850        | -0.081   |

---

|    |     |        |        |
|----|-----|--------|--------|
| 46 | O46 | -0.956 | -0.165 |
| 47 | O47 | -0.596 | -0.031 |
| 48 | O48 | -0.893 | -0.102 |
| 49 | O49 | -0.602 | -0.036 |
| 50 | O50 | -0.834 | -0.081 |
| 51 | O51 | -0.609 | -0.040 |
| 52 | O52 | -0.942 | -0.174 |
| 53 | O53 | -0.622 | -0.055 |
| 54 | N54 | +0.807 | +0.902 |
| 55 | C55 | -0.332 | -0.190 |
| 56 | C56 | -0.579 | -0.192 |
| 57 | H57 | +0.040 | -0.042 |
| 58 | H58 | +0.139 | +0.012 |
| 59 | H59 | +0.142 | +0.064 |
| 60 | H60 | +0.153 | +0.105 |
| 61 | H61 | +0.114 | +0.079 |
| 62 | H62 | +0.179 | +0.082 |
| 63 | H63 | +0.206 | +0.111 |
| 64 | H64 | +0.172 | +0.065 |
| 65 | O65 | -0.024 | +0.003 |
| 66 | O66 | -0.008 | -0.003 |
| 67 | H67 | +0.062 | +0.011 |
| 68 | N69 | +1.140 | +0.900 |
| 69 | C70 | -0.684 | -0.186 |
| 70 | C71 | -0.755 | -0.192 |
| 71 | H72 | -0.024 | -0.042 |
| 72 | H73 | +0.196 | +0.064 |
| 73 | H74 | +0.227 | +0.105 |
| 74 | H75 | +0.185 | +0.080 |
| 75 | H76 | +0.201 | +0.081 |
| 76 | H77 | +0.238 | +0.110 |
| 77 | H78 | +0.220 | +0.066 |
| 78 | H68 | +0.060 | +0.012 |
| 79 | N79 | +1.156 | +0.900 |
| 80 | C80 | -0.711 | -0.186 |
| 81 | C81 | -0.748 | -0.192 |
| 82 | H82 | -0.027 | -0.042 |
| 83 | H83 | +0.204 | +0.064 |
| 84 | H84 | +0.231 | +0.104 |
| 85 | H85 | +0.191 | +0.080 |
| 86 | H86 | +0.197 | +0.081 |
| 87 | H87 | +0.238 | +0.110 |
| 88 | H88 | +0.216 | +0.065 |

---
